# Supplementary material for: Longitudinal Measures of Blood Pressure and Subclinical Atrial Arrhythmias: The MESA and the ARIC Study
Source: PubMed Central journal article supplement — J Am Heart Assoc. 2021 May 20;10(11):e020260. doi: 10.1161/JAHA.120.020260 (PMC8483516; doi:10.1161/jaha.120.020260), 2021-05-20
Supplement: JAH3-10-e020260-s001.pdf [file JAH3-10-e020260-s001.pdf]

# **Supplemental Material**

**Table S1. Meta analyzed result for association between visit-to-visit variability and subclinical arrhythmias.**

|                                | Results using standard deviation to assess variability* | Results using square root of residual mean square to assess variability <sup>a</sup> |
|--------------------------------|---------------------------------------------------------|--------------------------------------------------------------------------------------|
| <b>Systolic blood pressure</b> |                                                         |                                                                                      |
| Subclinical AF                 | 1.32 (1.05, 1.58)                                       | 1.20 (1.02, 1.38)                                                                    |
| PACs/hr                        | 1.08 (1.00, 1.16)                                       | 1.08 (1.01, 1.15)                                                                    |
| SVT/hr                         | 1.00 (0.95, 1.16)                                       | 1.00 (0.95, 1.05)                                                                    |
| <b>Pulse pressure</b>          |                                                         |                                                                                      |
| Subclinical AF                 | 1.18 (0.94, 1.41)                                       | 1.18 (1.00, 1.37)                                                                    |
| PACs/hr                        | 1.05 (0.96, 1.12)                                       | 1.04 (0.96, 1.12)                                                                    |
| SVT/hr                         | 1.00 (0.94, 1.06)                                       | 1.04 (0.98, 1.10)                                                                    |

\*Models adjust for age, sex, race/ethnicity, site, height, weight, diabetes and use of antihypertensive medications

Figure S1. Dates of follow-up exams in the Multi-Ethnic Study of Atherosclerosis and the Atherosclerosis Risk in Communities cohorts.

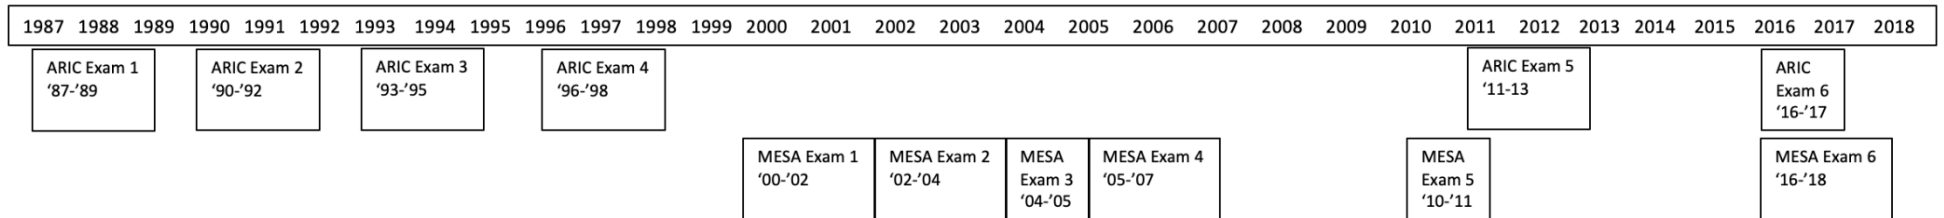

**Figure S2. Meta-analysis results for associations between diastolic blood pressure exposure variables and atrial arrhythmias.**

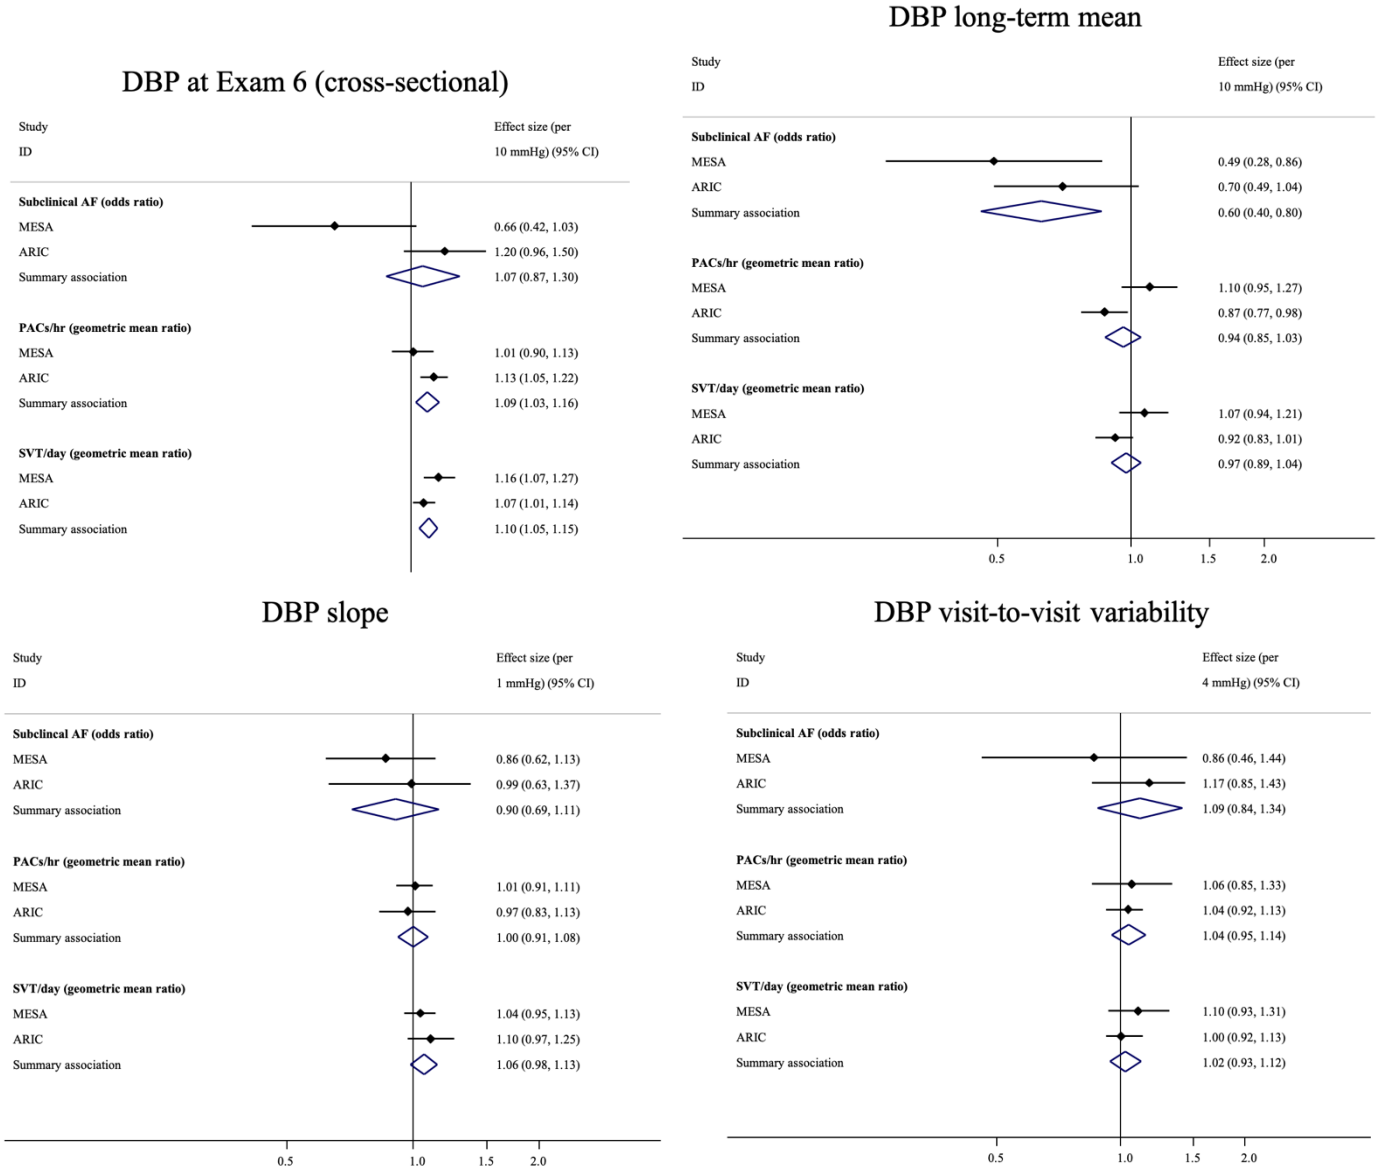

Models adjust for age, sex, race/ethnicity, site, height, weight, diabetes and use of antihypertensive medications.
